# Supplementary material for: Design, Synthesis and Biological Evaluation of 2-(2-Amino-5(6)-nitro-1H-benzimidazol-1-yl)-N-arylacetamides as Antiprotozoal Agents
Source: PubMed Central journal article supplement (PMC6154724; doi:10.3390/molecules22040579), 2017-04-04
Supplement: molecules-22-00579-s001.pdf [file molecules-22-00579-s001.pdf]

# Design, Synthesis and Biological Evaluation of 2-(2-Amino-5(6)-nitro-1*H*-benzimidazol-1-yl)-*N*-aryl-acetamides as Antiprotozoal Agents

Emanuel Hernández-Núñez<sup>1\*</sup>, Hugo Tlahuext<sup>2</sup>, Rosa Moo-Puc<sup>3</sup>, Diego Moreno<sup>4</sup>, María Ortencia González-Díaz<sup>5</sup>, and Gabriel Navarrete Vázquez<sup>6</sup>

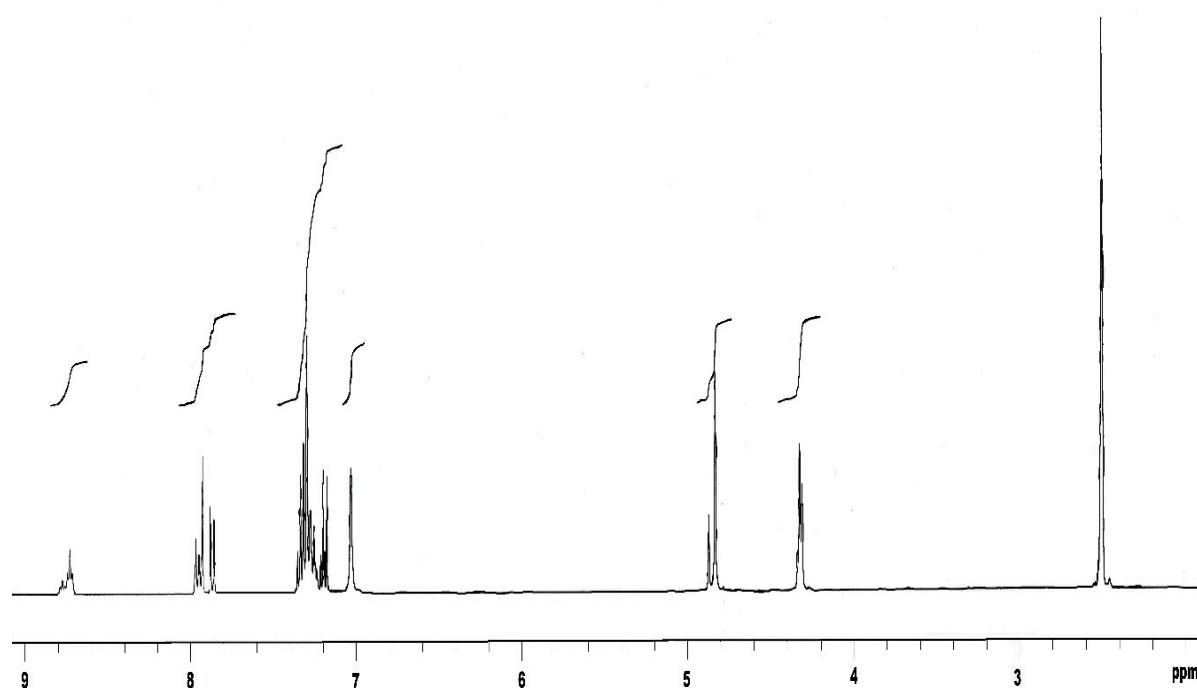

Figure S1. <sup>1</sup>H-NMR 2-(2-amino-5(6)-nitro-1*H*-benzimidazol-1-yl)-*N*-benzylacetamide (1).

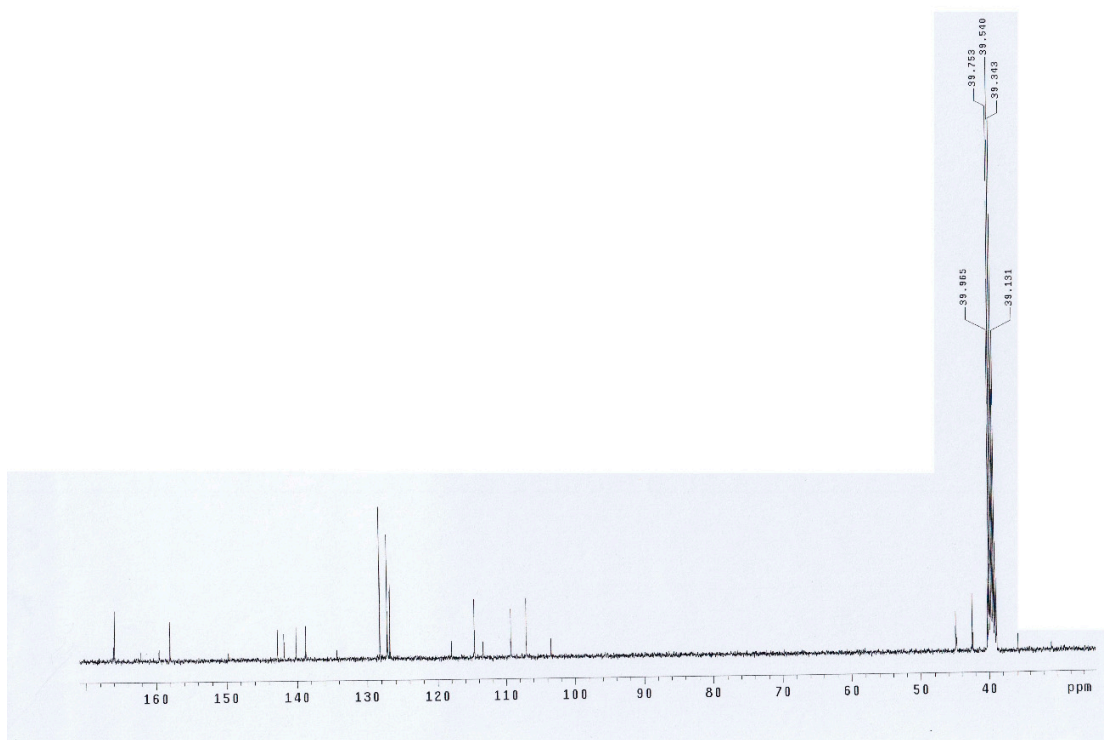

**Figure S2.** <sup>13</sup>C-NMR 2-(2-amino-5(6)-nitro-1*H*-benzimidazol-1-yl)-*N*-benzylacetamide (1).

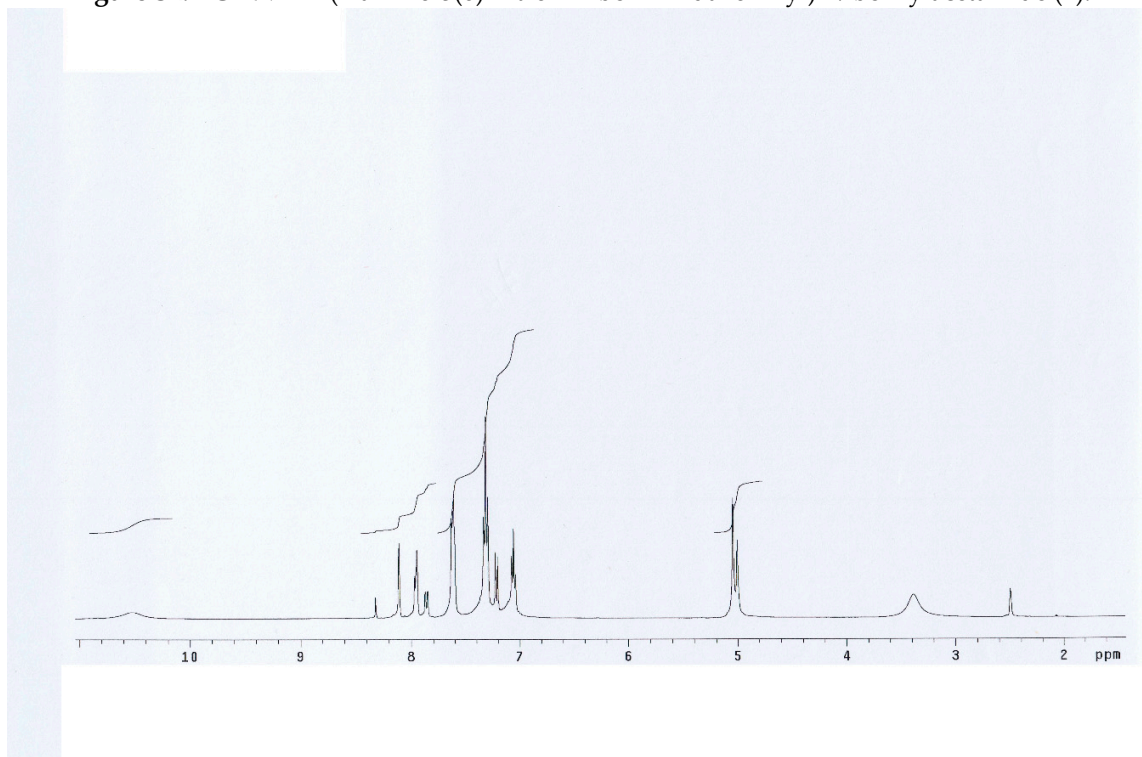

**Figure S3.** <sup>1</sup>H-NMR 2-(2-amino-5(6)-nitro-1*H*-benzimidazol-1-yl)-*N*-phenylacetamide (2).

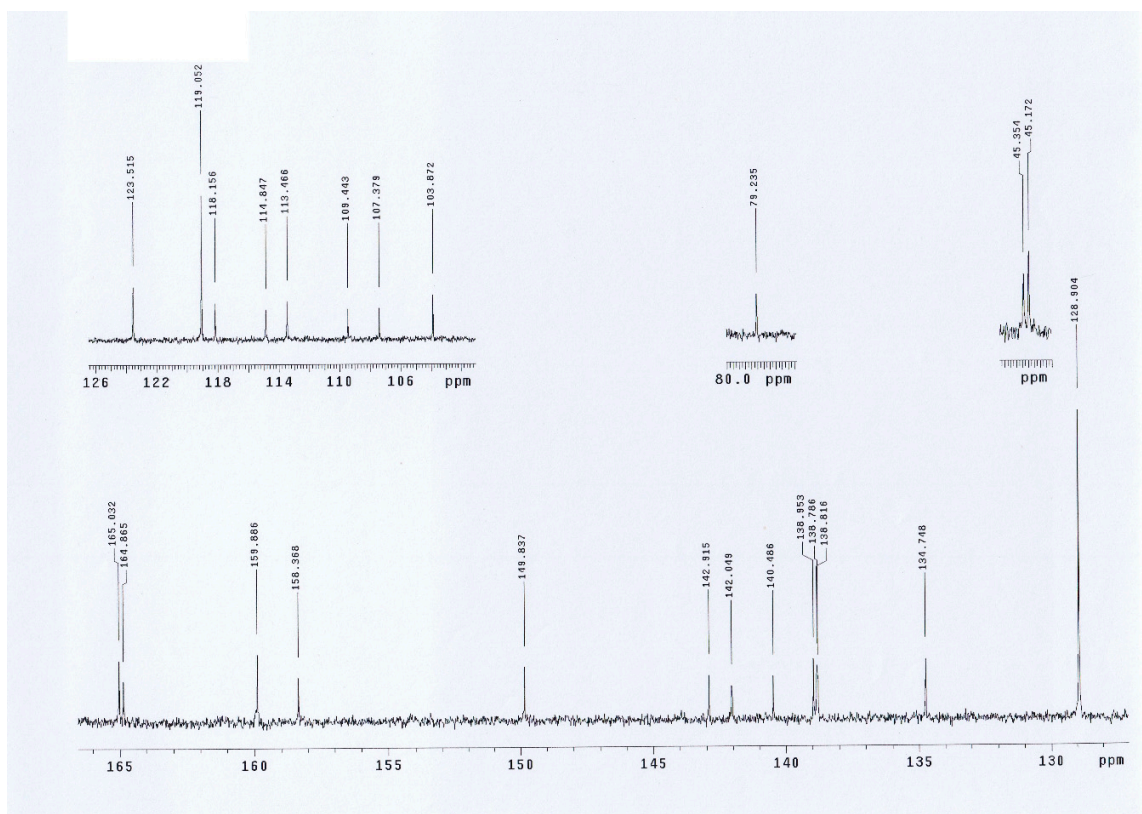

Figure S4.  $^{13}\text{C}$ -NMR 2-(2-amino-5(6)-nitro-1H-benzimidazol-1-yl)-N-phenylacetamide (2).

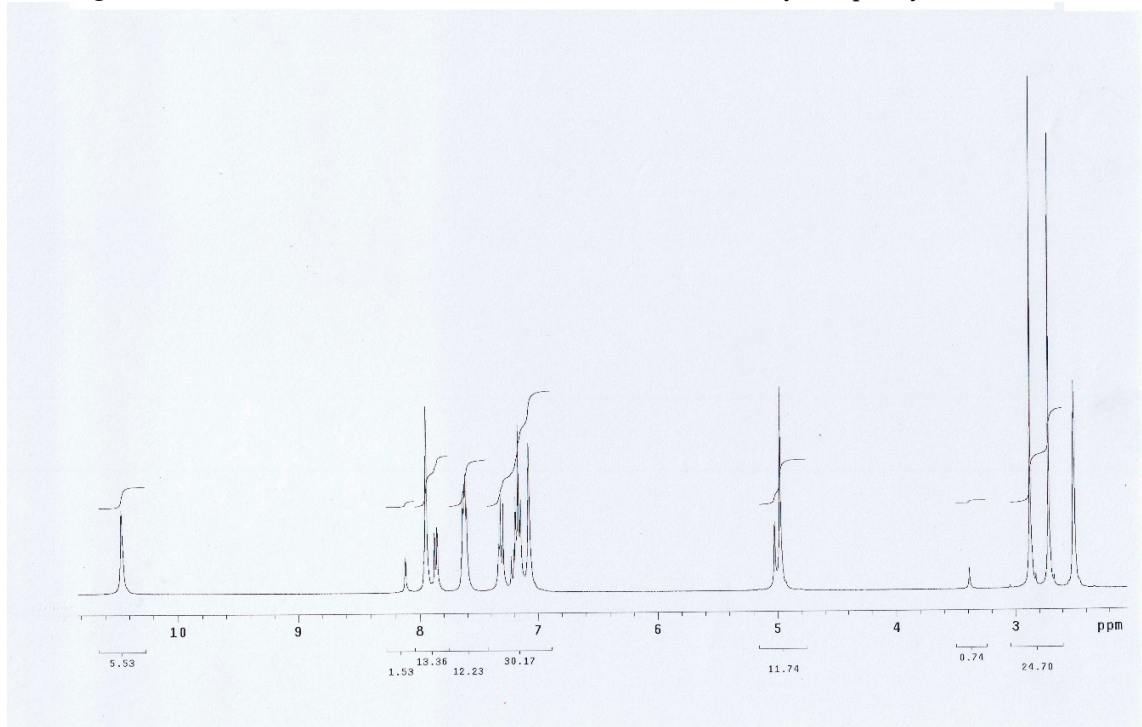

Figure S5.  $^1\text{H}$ -NMR 2-(2-amino-5(6)-nitro-1H-benzimidazol-1-yl)-N-(4-fluorophenyl) acetamide (3).



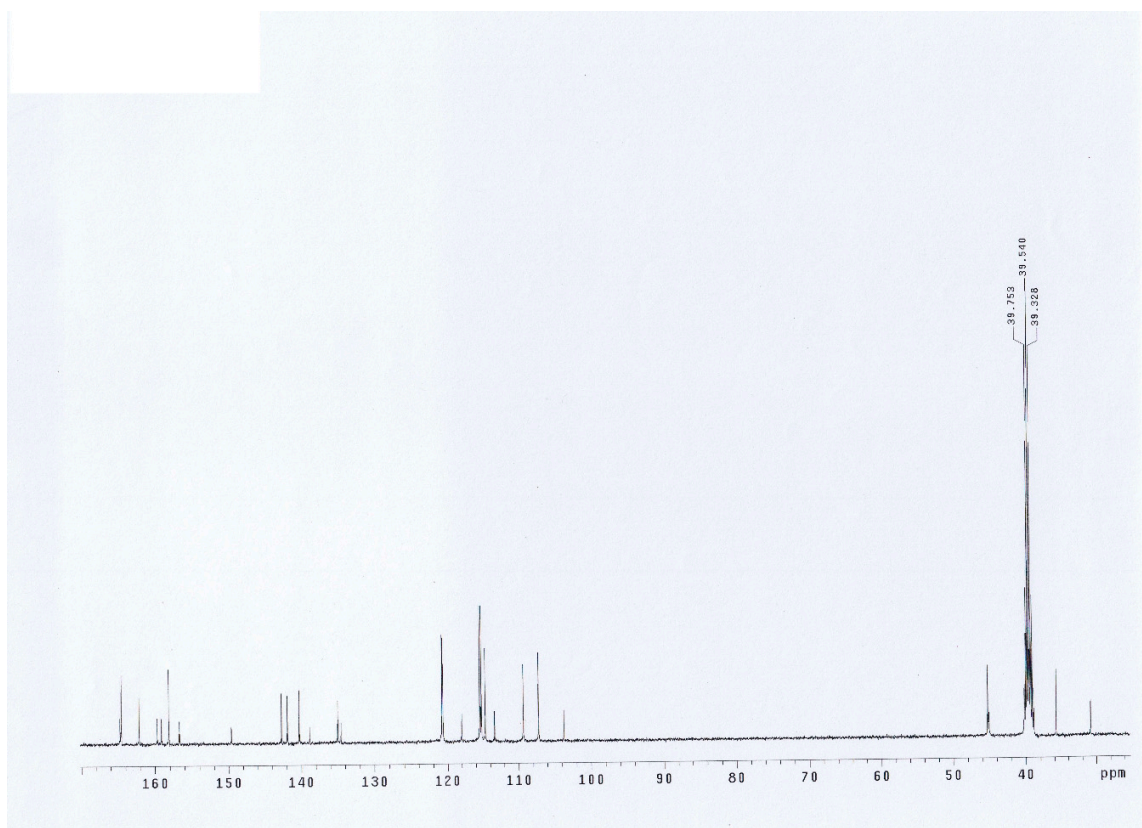

**Figure S6.**  $^{13}\text{C}$ -NMR 2-(2-amino-5(6)-nitro-1*H*-benzimidazol-1-yl)-*N*-(4-fluorophenyl) acetamide (**3**).

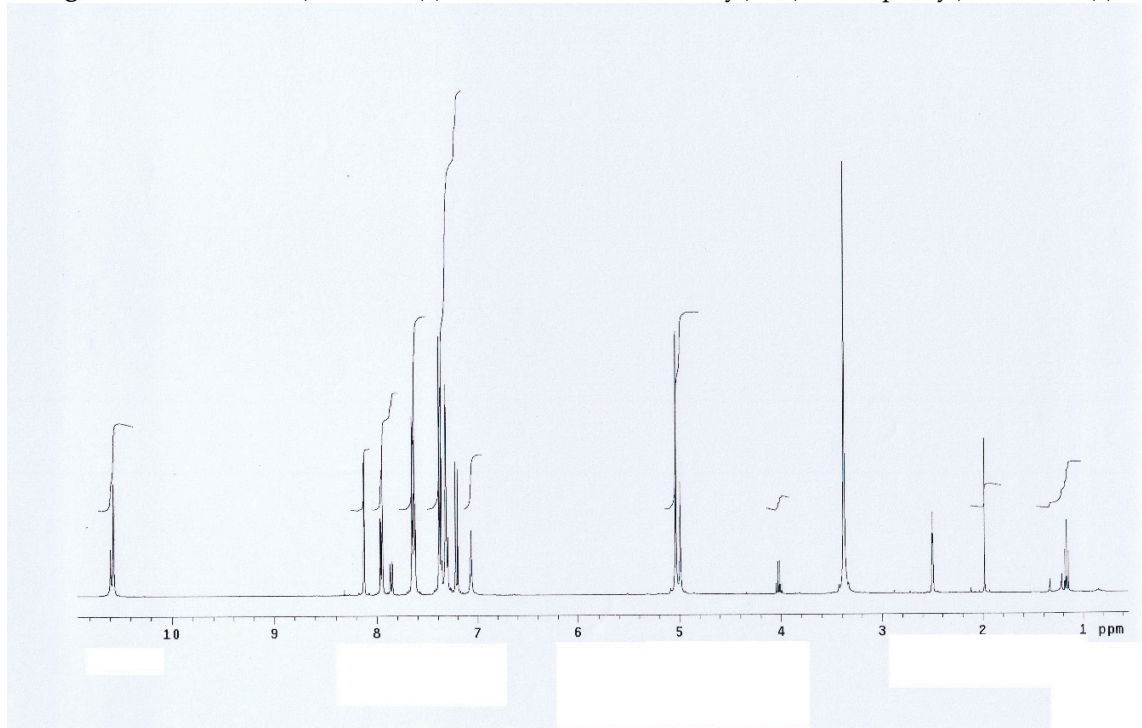

**Figure S7.**  $^1\text{H}$ -NMR 2-(2-amino-5(6)-nitro-1*H*-benzimidazol-1-yl)-*N*-(4-chlorophenyl) acetamide (**4**).



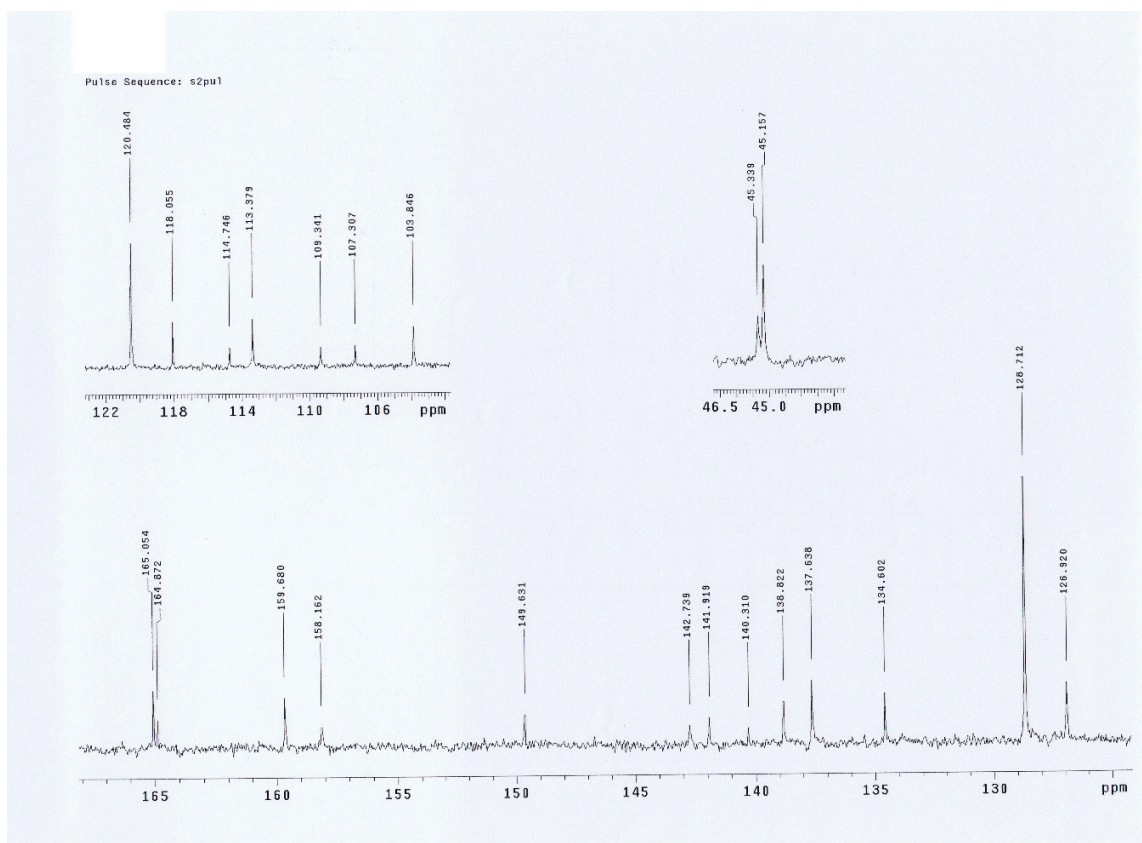

**Figure S8.**  $^{13}\text{C}$ -NMR 2-(2-amino-5(6)-nitro-1*H*-benzimidazol-1-yl)-*N*-(4-chlorophenyl) acetamide (**4**).

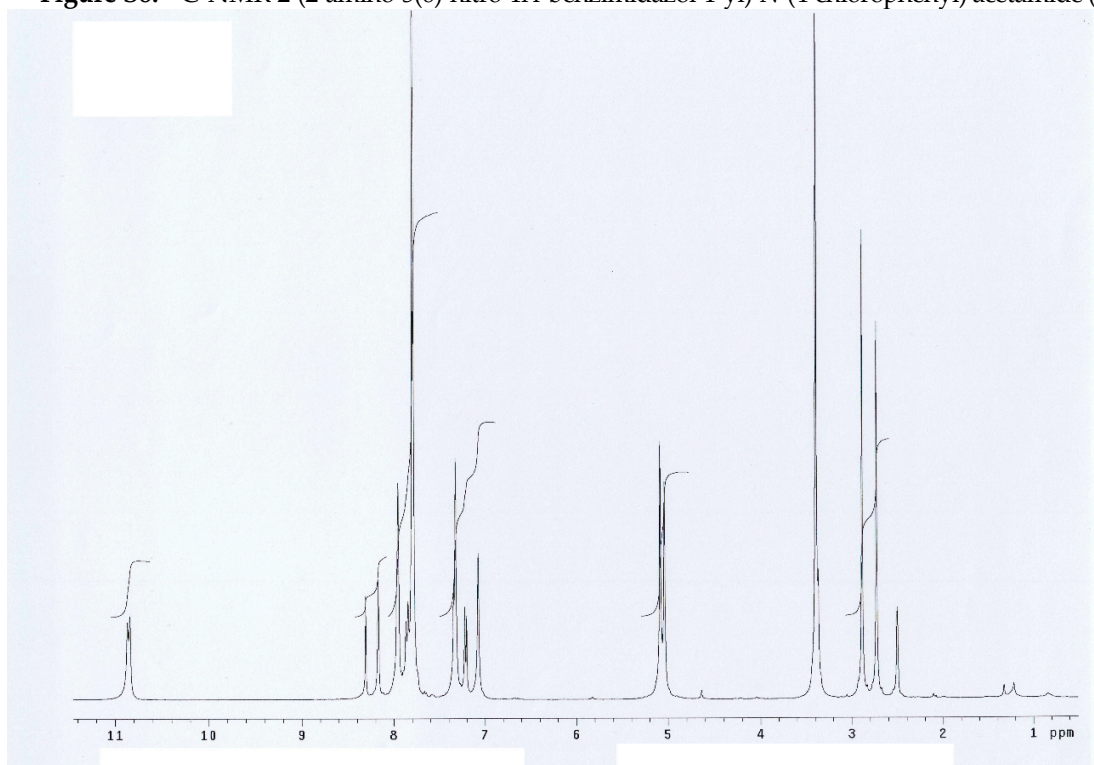

**Figure S9.**  $^1\text{H}$ -NMR 2-(2-amino-5(6)-nitro-1*H*-benzimidazol-1-yl)-*N*-(4-cyanophenyl) acetamide (**5**).



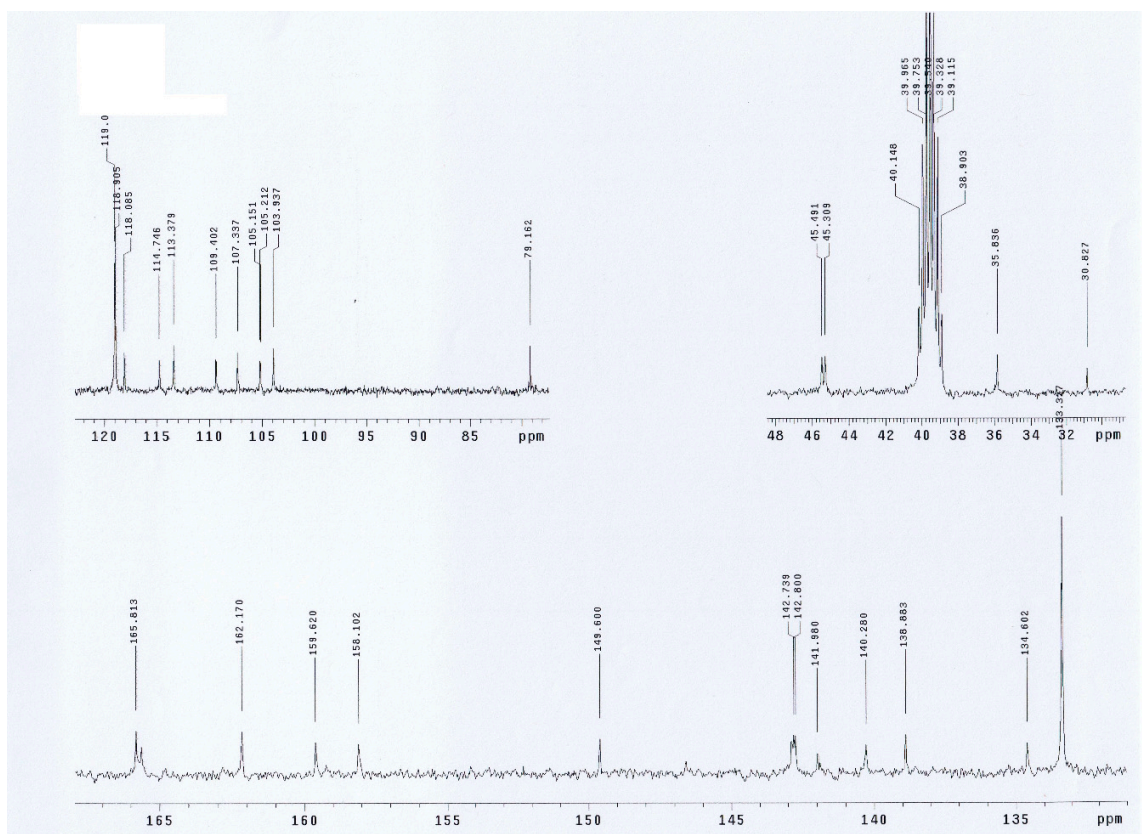

Figure S10.  $^{13}\text{C}$ -NMR 2-(2-amino-5(6)-nitro-1H-benzimidazol-1-yl)-N-(4-cyanophenyl) acetamide (5).

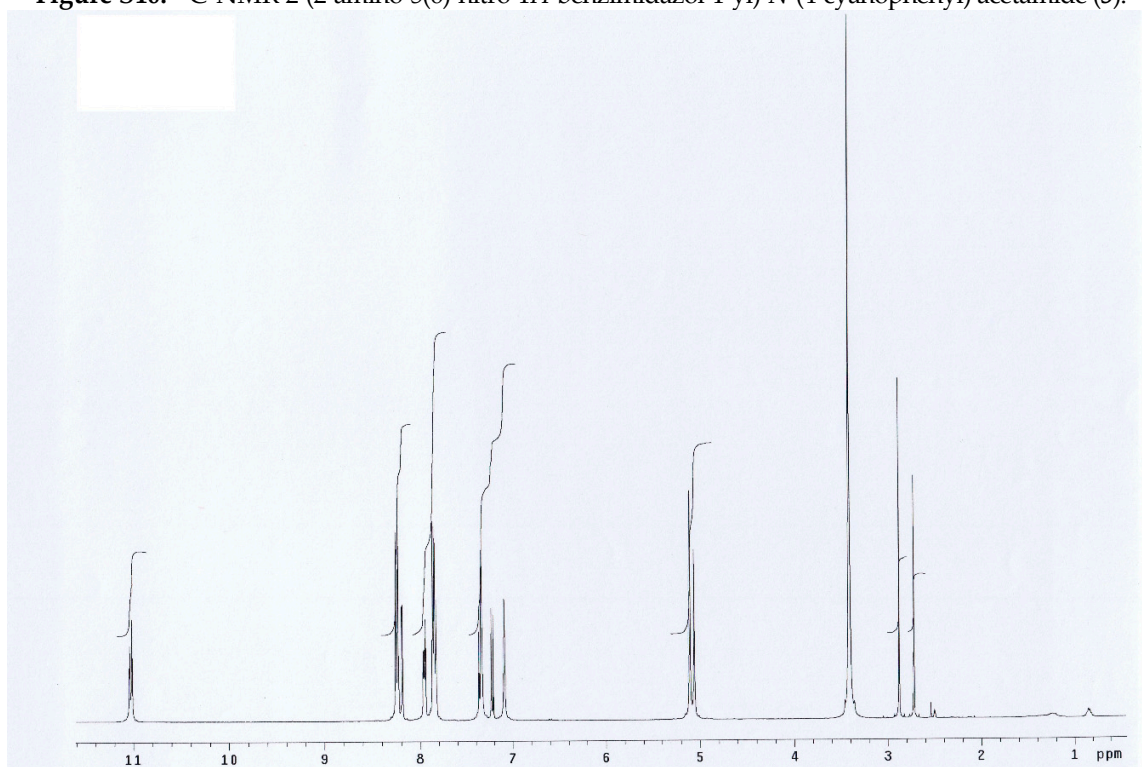

Figure S11.  $^1\text{H}$ -NMR 2-(2-amino-5(6)-nitro-1H-benzimidazol-1-yl)-N-(4-nitrophenyl) acetamide (6).



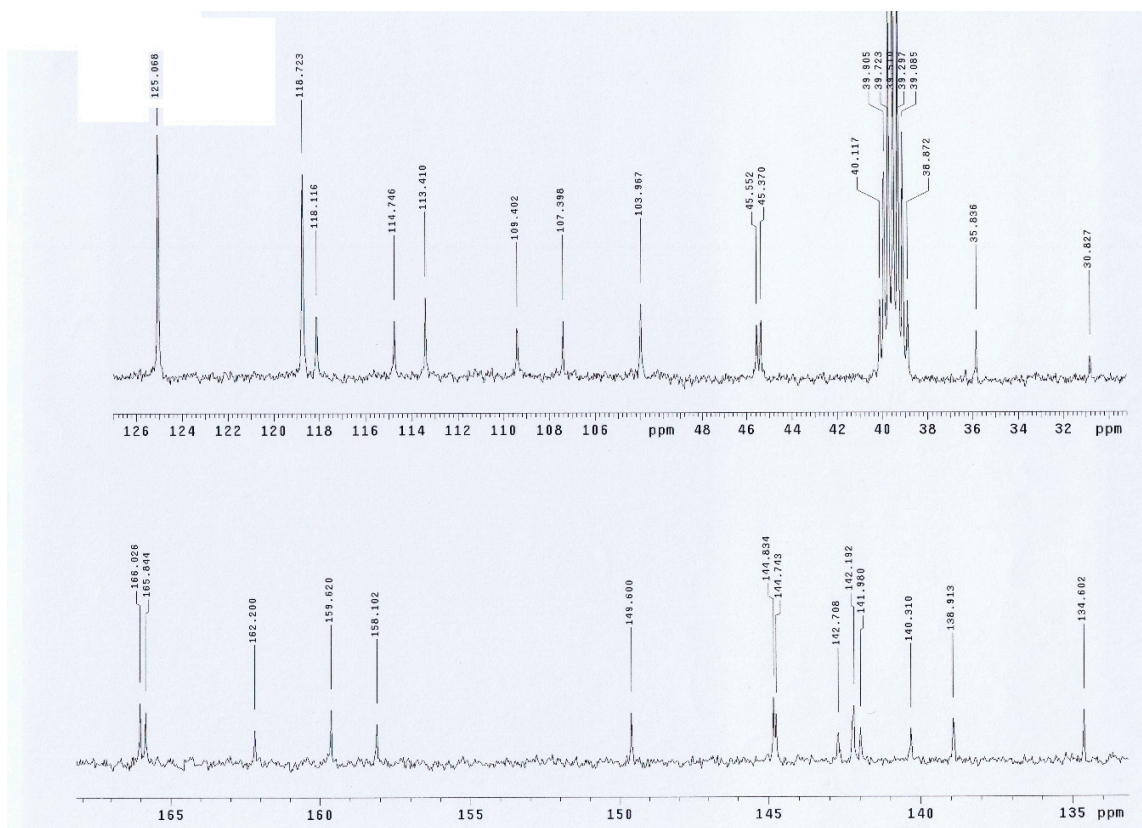

Figure S12.  $^{13}\text{C}$ -NMR 2-(2-amino-5(6)-nitro-1H-benzimidazol-1-yl)-N-(4-nitrophenyl) acetamide (6).

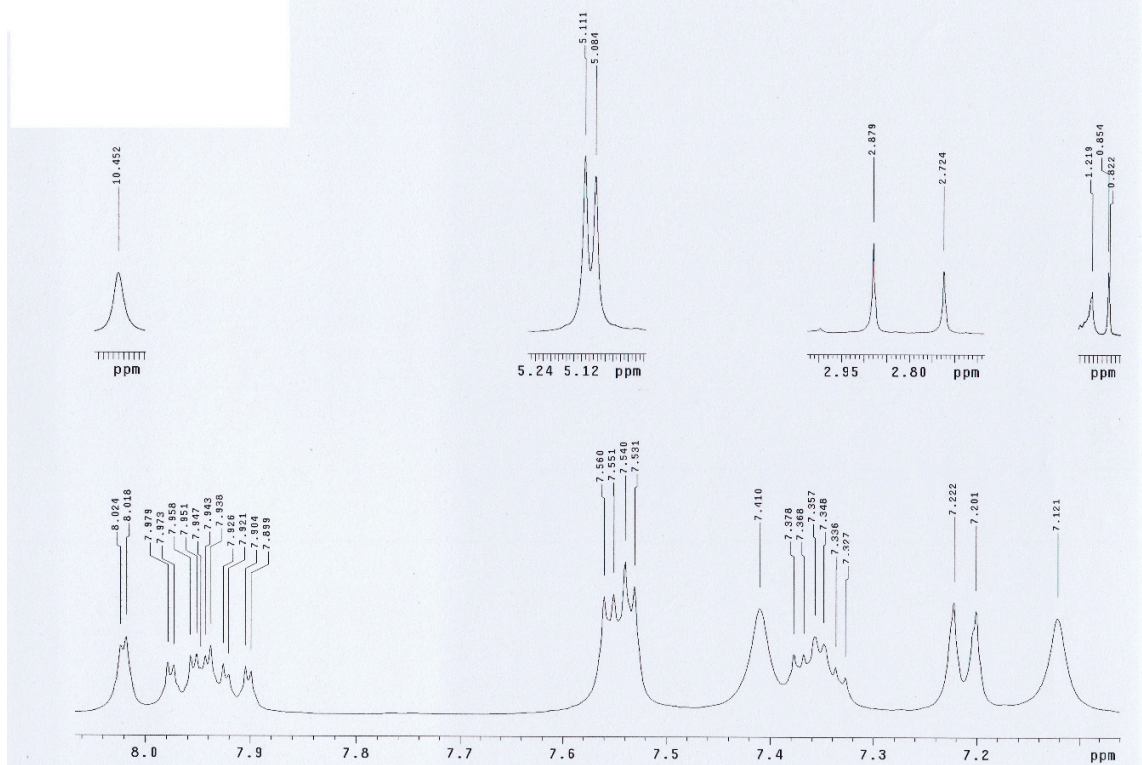

Figure S13.  $^1\text{H}$ -NMR 2-(2-amino-5(6)-nitro-1H-benzimidazol-1-yl)-N-(2,6-dichlorophenyl) acetamide (7).



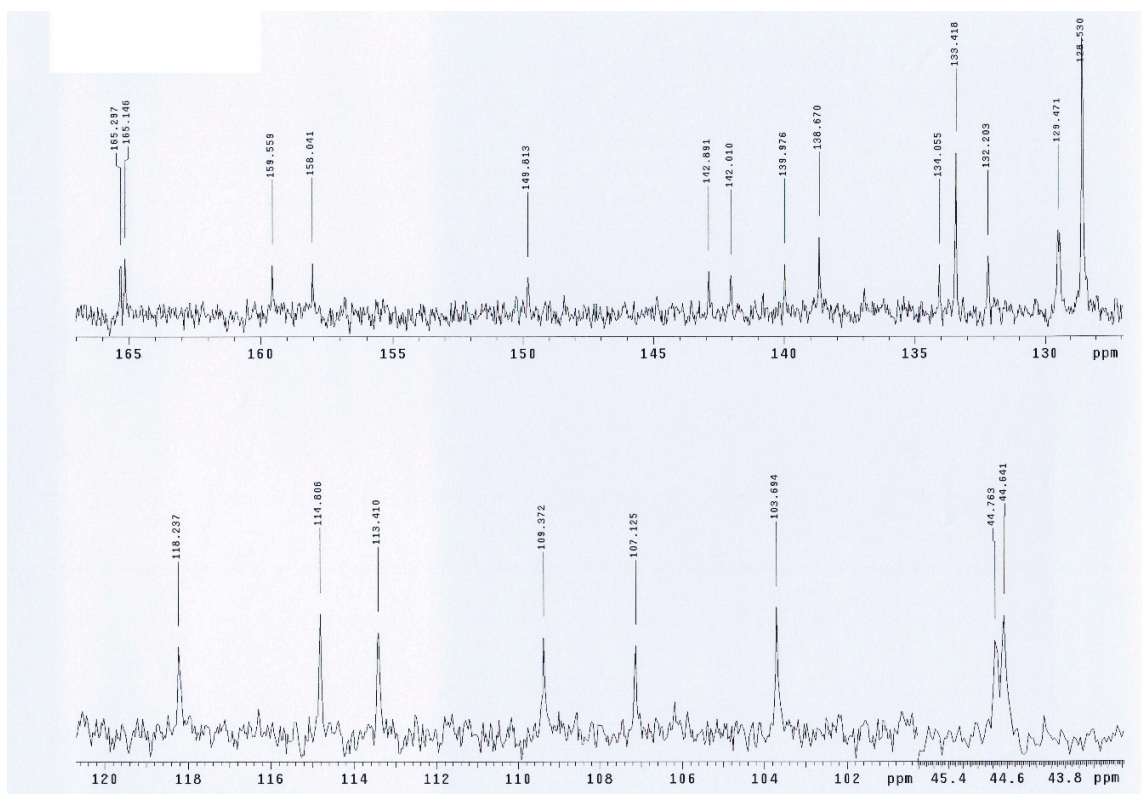

**Figure S14.**  $^{13}\text{C}$ -NMR 2-(2-amino-5(6)-nitro-1*H*-benzimidazol-1-yl)-*N*-(2,6-dichlorophenyl) acetamide (7).

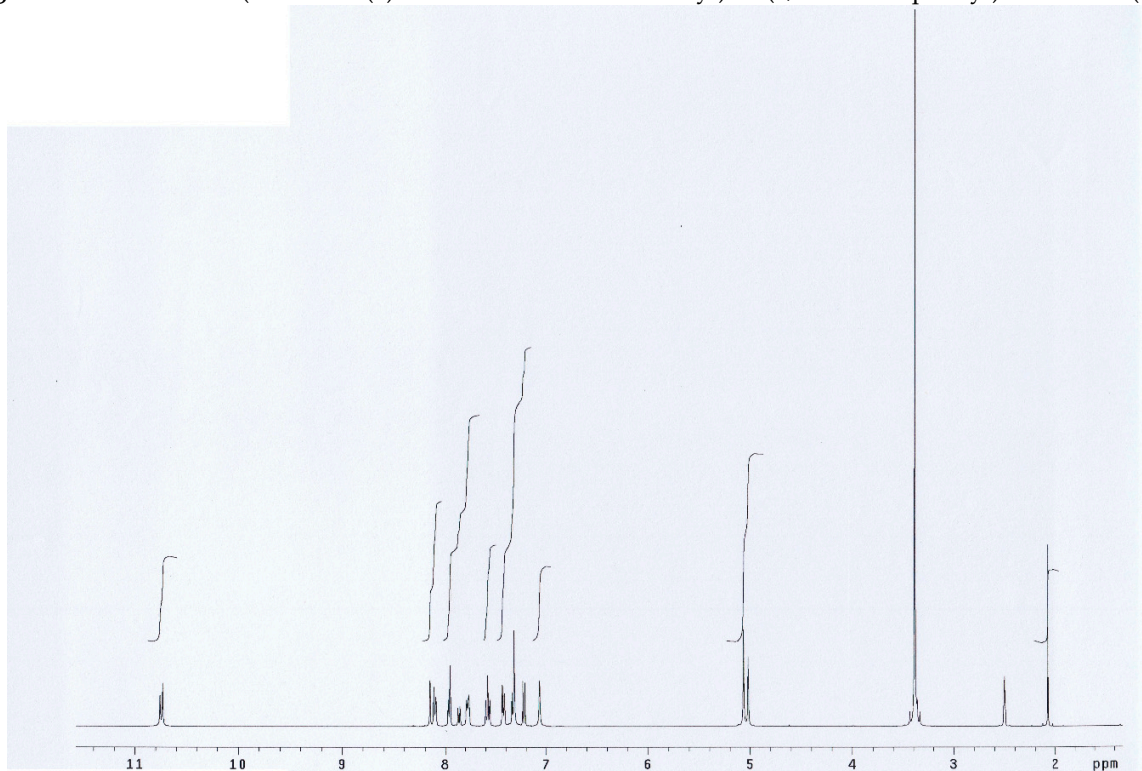

**Figure S15.**  $^1\text{H}$ -NMR 2-(2-amino-5(6)-nitro-2,3-dihydro-1*H*-benzimidazol-1-yl)-*N*-[3-(trifluoromethyl)phenyl]acetamide (8).



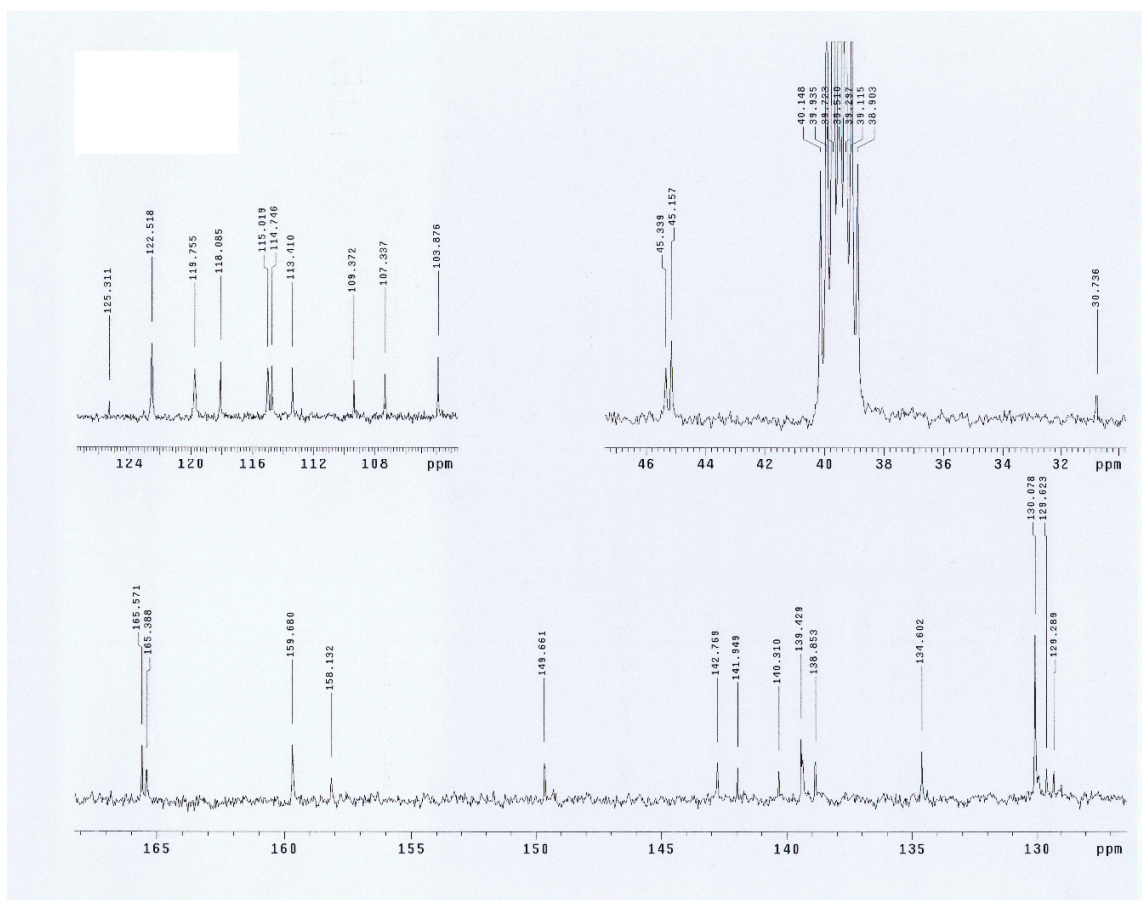

**Figure S16.** <sup>13</sup>C-NMR 2-(2-amino-5(6)-nitro-2,3-dihydro-1*H*-benzimidazol-1-yl)-*N*-[3-(trifluoromethyl)phenyl]acetamide (8).
